# Supplementary material for: Preparation of poly(ionic liquid) nanoparticles and their novel application as flocculants for water purification
Source: Royal Society of Chemistry journal article supplement (doi:10.1039/c5py02001h), 2016-01-01
Supplement: c5py02001h1.pdf [file c5py02001h1.pdf]

## SUPPORTING INFORMATION

### Preparation of poly(ionic liquid) nanoparticles and their novel application as flocculants for water purification

Mehmet Isik,<sup>a†</sup> Ana M. Fernandes,<sup>a†</sup> Kari Vijayakrishna,<sup>c</sup> Maria Paulis<sup>a</sup> and David Mecerreyes<sup>\*a,b</sup>

<sup>a</sup> POLYMAT, University of the Basque Country UPV/EHU, Avda. Tolosa, 72, 20018, San Sebastian, Spain. Fax: +34 943 506062; Tel: +34 943 018018; E-mail: david.mecerreyes@ehu.es

<sup>b</sup> IKERBASQUE, Basque Foundation for Science, E-48011, Bilbao, Spain.

<sup>c</sup> Organic Chemistry Division, School of Advanced Sciences, VIT University, Vellore 632014, India

<sup>†</sup> These authors contributed equally to this paper.

#### Synthesis of the RAFT agent

Detailed synthesis procedure is explained elsewhere.<sup>1</sup> 15 g of potassium ethyl xanthogenate was mixed with 13.6 g of (1-bromoethyl) benzene in the presence of ethanol as the reaction solvent (15% solids content). The reaction was conducted for 4 hours and 250 ml of distilled water was introduced. Liquid-liquid extraction was performed with dichloromethane. The yellowish liquid product was dried over magnesium sulfate and the structure was confirmed by <sup>1</sup>H NMR.

#### 1-Vinyl-3-ethylimidazolium bromide monomer synthesis

The monomer was synthesized by quaternizing 1-vinylimidazole with bromoethane. In a typical reaction, 5 g of 1-vinylimidazole was mixed with 7 g of bromoethane at 40°C. Upon the solidification of the product, 4 ml of DMF was introduced. After 24 hours the crude product was washed with excess ethylacetate and dried under reduced pressure. The structure of the monomer was confirmed by <sup>1</sup>H NMR.

#### Synthesis of Poly (1-Vinyl-3-ethylimidazolium bromide) (PViEtImBr)

In a typical polymerization reaction, 1 g of vinyl-3-ethylimidazolium bromide was introduced into a 25 ml one-neck-round-bottom flask and 37.1 mg of RAFT agent was introduced with 4 ml of DMF. Nitrogen was passed through the reactor which was immersed in an oil bath at 70°C. Then 5 mg of AIBN initiator dissolved in 1 ml of DMF was introduced to the reaction mixture in one shot. The reaction was conducted for 24 hours. The crude product was washed with dichloromethane and analyzed by <sup>1</sup>H NMR to confirm the formation of the polymer.

**1-Vinyl-3-ethylimidazolium bromide monomer**

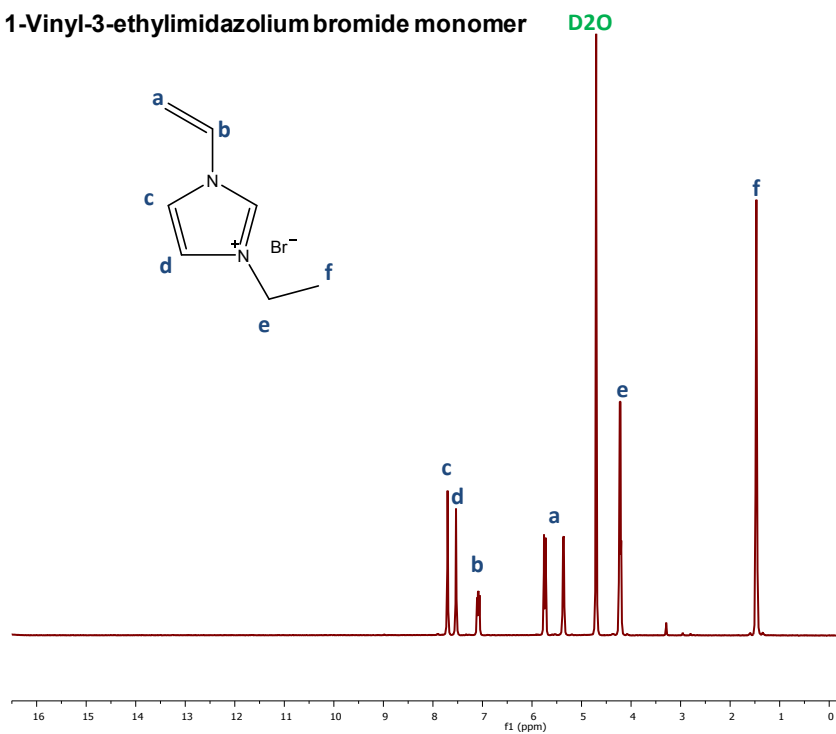

**Fig. S1** <sup>1</sup>H NMR Spectra of 1-Vinyl-3-ethylimidazolium bromide monomer.

**Poly (1-Vinyl-3-ethylimidazolium bromide)**

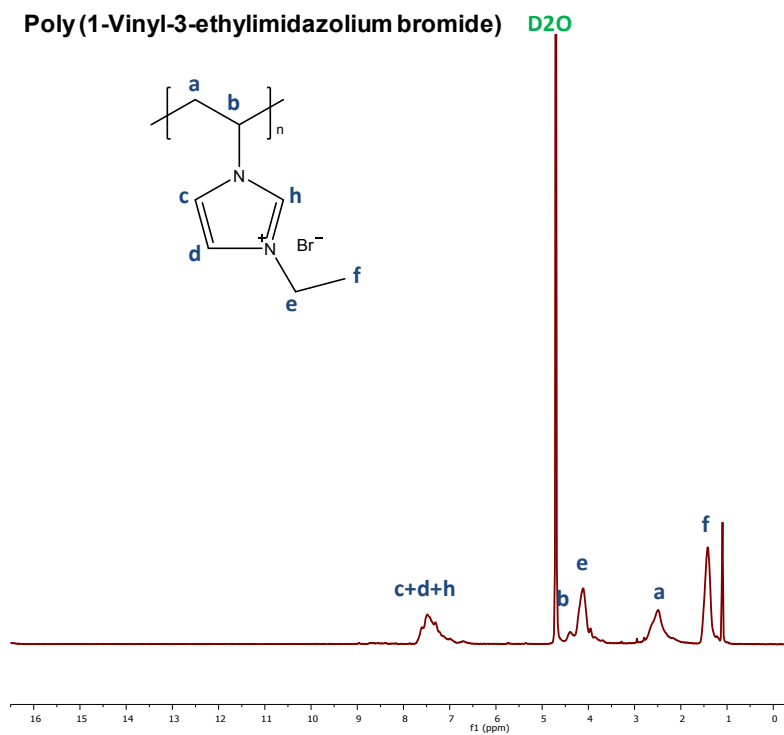

**Fig. S2** <sup>1</sup>H RMN Spectra of Poly (1-Vinyl-3-ethylimidazolium bromide).

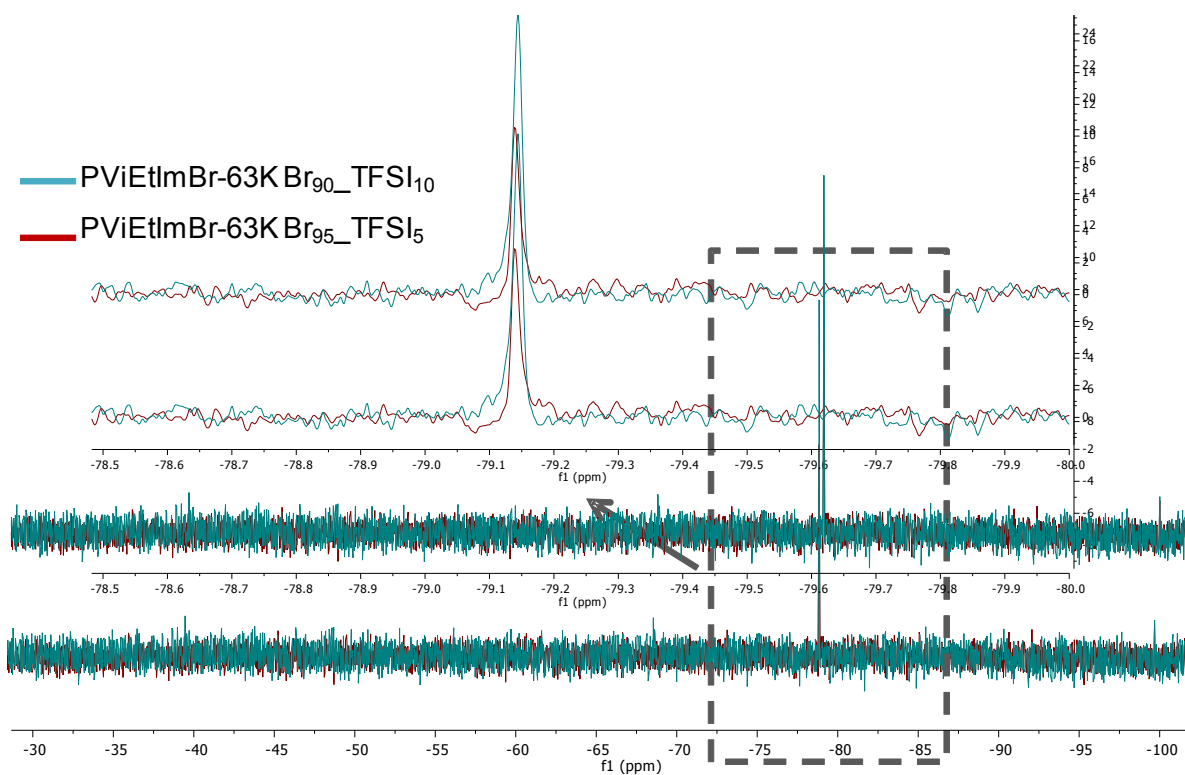

**Fig. S3**  $^{19}\text{F}$  RMN Spectra of PViEtImBr-63K  $_{90}\text{TFSI}_{10}$  and PViEtImBr-63K  $_{90}\text{TFSI}_5$ .

**Table S1** Elemental analysis results of the PolyViEtImBr-20K $_{100}$ , PolyViEtImBr-20K $_{90}\text{TFSI}_{10}$ , PolyViEtIm-20K  $\text{TFSI}_{100}$ . Numbers in parenthesis are theoretical values.

| Code                                     | C           | H         | N           | S           |
|------------------------------------------|-------------|-----------|-------------|-------------|
| PolyViEtImBr-20K $_{100}$                | 41.0 (41.4) | 5.7 (5.5) | 13.7 (13.7) | -           |
| PolyViEtImBr-20K $_{90}\text{TFSI}_{10}$ | 36.7 (34.5) | 5.9 (4.0) | 12.0 (10.6) | 2.3 (2.3)   |
| PolyViEtIm-20K $\text{TFSI}_{100}$       | 28.7 (26.8) | 2.9 (2.7) | 10.6 (10.4) | 14.7 (15.9) |

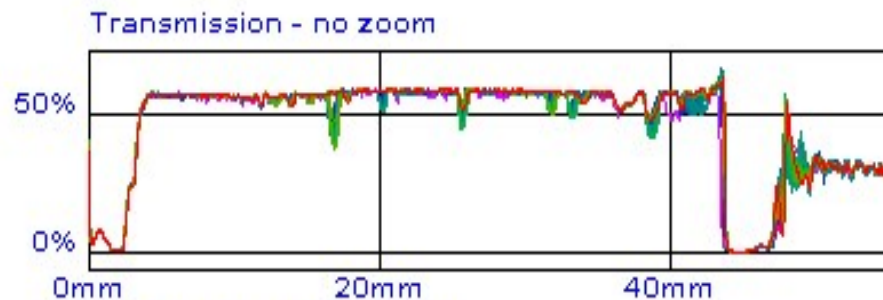

**Fig. S4** Stability of the diluted dispersion of silica obtained through light scattering by use of TURBISCAN LAB<sup>expert</sup>, during 10 hours at ambient temperature.

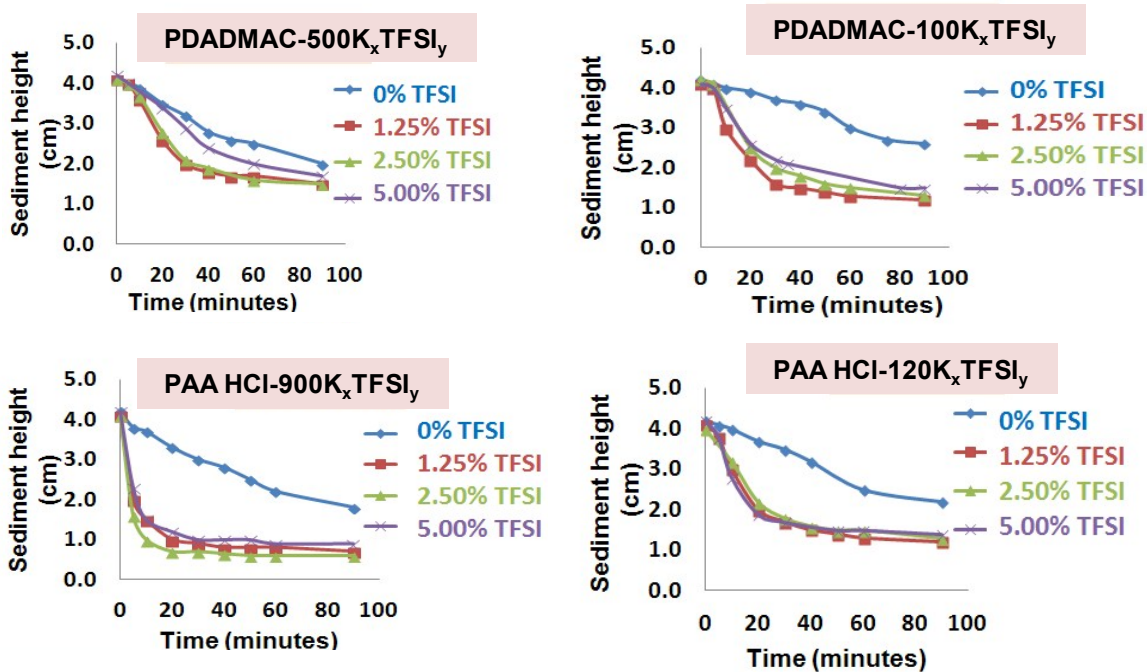

**Fig. S5** Evolution rate of the sediment for PDADMAC-500K<sub>x</sub>TFSI<sub>y</sub>, PDADMAC-100K<sub>x</sub>TFSI<sub>y</sub>, PAAHCl-900K<sub>x</sub>TFSI<sub>y</sub> and PAAHCl-120K<sub>x</sub>TFSI<sub>y</sub> series.

## References

1- H. Mori, M. Yahagi, T. Endo, *Macromolecules*, **2009**, 42, 8082-8092.
